# Supplementary material
Source: PubMed Central journal article supplement (PMC6702508)
Supplement: 40121_2019_246_MOESM1_ESM.pdf [file 40121_2019_246_MOESM1_ESM.pdf]

## SUPPLEMENTARY MATERIAL

TABLE S 1: DETAILED BASE-CASE RESULTS OF THE COST-UTILITY ANALYSIS

| Results (per capita)                               | No vaccination | With HRV       | Difference |
|----------------------------------------------------|----------------|----------------|------------|
| <b>RVGE-related events</b>                         |                |                |            |
| Homecare-RVGE                                      | 0.007108       | 0.003425       | -52%       |
| Outpatient-RVGE                                    | 0.021259       | 0.010243       | -52%       |
| Inpatient-RVGE                                     | 0.015498       | 0.004213       | -73%       |
| RVGE-related death                                 | 0.000034       | 0.000001       | -96%       |
| <b>Costs; THB (USD)<sup>a</sup></b>                |                |                |            |
| <i>Vaccination costs</i>                           |                |                |            |
| All perspectives <sup>b</sup>                      | 0 (0)          | 141 (4)        | 141 (4)    |
| <i>Total direct medical costs</i>                  |                |                |            |
| All perspectives <sup>b</sup>                      | 82 (2)         | 26 (1)         | -56 (-2)   |
| <i>Total direct non-medical costs</i>              |                |                |            |
| Societal perspective (base-case perspective)       | 57 (2)         | 22 (1)         | -34 (-1)   |
| Societal perspective excluding productivity losses | 5 (0)          | 2 (0)          | -3 (0)     |
| Healthcare perspective                             | N/A            | N/A            | N/A        |
| <i>Total costs</i>                                 |                |                |            |
| Societal perspective (base-case perspective)       | 138 (4)        | 190 (6)        | 51 (2)     |
| Societal perspective excluding productivity losses | 87 (3)         | 169 (5)        | 82 (2)     |
| Healthcare perspective                             | 82 (2)         | 167 (5)        | 86 (3)     |
| <b>Discounted health outcomes</b>                  |                |                |            |
| Net QALY loss                                      | 0.001120       | 0.000092       | -0.001027  |
| Net LY loss                                        | 0.001009       | 0.000037       | -0.000971  |
| <i>ICER; THB (USD) per QALY gained</i>             |                |                |            |
| Societal perspective (base-case perspective)       |                | 49,923 (1,471) |            |
| Societal perspective excluding productivity losses |                | 80,126 (2,361) |            |
| Healthcare perspective                             |                | 83,351 (2,456) |            |
| <b>Undiscounted health outcomes</b>                |                |                |            |
| Net QALY loss                                      | 0.002393       | 0.000140       | -0.002253  |
| Net LY loss                                        | 0.002539       | 0.000094       | -0.002445  |
| <i>ICER; THB (USD) per QALY gained</i>             |                |                |            |
| Societal perspective (base-case perspective)       |                | 22,763 (671)   |            |

|                                                    |                |
|----------------------------------------------------|----------------|
| Societal perspective excluding productivity losses | 36,535 (1,076) |
| Healthcare perspective                             | 38,005 (1,120) |

---

<sup>a</sup> The annual 2017 exchange rate (THB 33.9385/USD) was applied [59]

<sup>b</sup> The relevant estimates were the same for all the perspectives considered i.e.(i) societal perspective (base-case perspective), (ii) societal perspective excluding productivity losses, and (iii) healthcare perspective

HRV: human rotavirus vaccine; ICER: incremental cost-effectiveness ratio; LY: life-year; N/A: not applicable;

QALY: quality-adjusted life year; RVGE: rotavirus gastroenteritis; THB: Thai baht; USD: United States dollar

**TABLE S 2: DETAILED RESULTS OF THE COST-UTILITY SCENARIO**

**ANALYSES**

| Results (per capita)                                                                      | No<br>vaccination | With<br>HRV    | Difference |
|-------------------------------------------------------------------------------------------|-------------------|----------------|------------|
| <b>Vaccine effectiveness scenario analysis based on Tharmaphornpilas et al. 2017 [25]</b> |                   |                |            |
| <i>RVGE-related events</i>                                                                |                   |                |            |
| Homecare-RVGE                                                                             | 0.007108          | 0.003425       | -52%       |
| Outpatient-RVGE                                                                           | 0.021259          | 0.010243       | -52%       |
| Inpatient-RVGE                                                                            | 0.015498          | 0.001996       | -87%       |
| RVGE-related death                                                                        | 0.000034          | 0.000002       | -93%       |
| <i>Costs; THB (USD)</i>                                                                   |                   |                |            |
| Vaccination costs                                                                         | 0 (0)             | 141 (4)        | 141 (4)    |
| Total direct medical costs                                                                | 82 (2)            | 17 (0)         | -65 (-2)   |
| Total direct non-medical costs                                                            | 57 (2)            | 19 (1)         | -38 (-1)   |
| Total costs                                                                               | 138 (4)           | 177 (5)        | 39 (1)     |
| <i>Discounted health outcomes</i>                                                         |                   |                |            |
| Net QALY loss                                                                             | 0.001120          | 0.000114       | -0.001006  |
| Net LY loss                                                                               | 0.001009          | 0.000070       | -0.000939  |
| ICER; THB (USD) per QALY gained                                                           |                   | 38,410 (1,132) |            |
| <i>Undiscounted health outcomes</i>                                                       |                   |                |            |
| Net QALY loss                                                                             | 0.002393          | 0.000202       | -0.002190  |
| Net LY loss                                                                               | 0.002539          | 0.000176       | -0.002363  |
| ICER; THB (USD) per QALY gained                                                           |                   | 17,637 (520)   |            |
| <b>Direct medical costs scenario analysis based on Tharmaphornpilas et al. 2015 [26]</b>  |                   |                |            |
| <i>Costs; THB (USD)<sup>a</sup></i>                                                       |                   |                |            |
| Vaccination costs                                                                         | 0 (0)             | 141 (4)        | 141 (4)    |
| Total direct medical costs                                                                | 115 (3)           | 34 (1)         | -81 (-2)   |
| Total direct non-medical costs                                                            | 57 (2)            | 22 (1)         | -34 (-1)   |
| Total costs                                                                               | 172 (5)           | 197 (6)        | 26 (1)     |
| <i>Discounted health outcomes</i>                                                         |                   |                |            |
| Net QALY loss                                                                             | 0.001120          | 0.000092       | -0.001027  |
| Net LY loss                                                                               | 0.001009          | 0.000037       | -0.000971  |
| ICER; THB (USD) per QALY gained                                                           |                   | 25,037 (738)   |            |
| <i>Undiscounted health outcomes</i>                                                       |                   |                |            |
| Net QALY loss                                                                             | 0.002393          | 0.000140       | -0.002253  |
| Net LY loss                                                                               | 0.002539          | 0.000094       | -0.002445  |
| ICER; THB (USD) per QALY gained                                                           |                   | 11,416 (336)   |            |

<sup>a</sup> The annual 2017 exchange rate (THB 33.9385/USD) was applied [59].

HRV: human rotavirus vaccine; ICER: incremental cost-effectiveness ratio; LY: life-year; QALY: quality-adjusted life year; RVGE: rotavirus gastroenteritis; THB: Thai baht; USD: United States dollar

**TABLE S 3: DETAILED BASE-CASE RESULTS OF THE BUDGET**

**IMPACT ANALYSIS**

| Costs; THB (USD)                            | Year                                      |                                           |                                             |                                             |                                             |
|---------------------------------------------|-------------------------------------------|-------------------------------------------|---------------------------------------------|---------------------------------------------|---------------------------------------------|
|                                             | 2019                                      | 2020                                      | 2021                                        | 2022                                        | 2023                                        |
| <b>No vaccination</b>                       |                                           |                                           |                                             |                                             |                                             |
| Vaccination costs                           | 0 (0)                                     | 0 (0)                                     | 0 (0)                                       | 0 (0)                                       | 0 (0)                                       |
| Outpatient visit costs                      | 50,374,674<br>(1,484,293)                 | 48,947,434<br>(1,442,239)                 | 47,556,018<br>(1,401,241)                   | 46,200,746<br>(1,361,308)                   | 44,884,097<br>(1,322,513)                   |
| Hospitalisation costs                       | 199,435,083<br>(5,876,367)                | 193,791,539<br>(5,710,080)                | 188,282,845<br>(5,547,766)                  | 182,917,079<br>(5,389,663)                  | 177,704,230<br>(5,236,066)                  |
| <b>Total costs</b>                          | <b>249,809,757</b><br><b>(7,360,660)</b>  | <b>242,738,973</b><br><b>(7,152,319)</b>  | <b>235,838,863</b><br><b>(6,949,007)</b>    | <b>229,117,825</b><br><b>(6,750,971)</b>    | <b>222,588,327</b><br><b>(6,558,579)</b>    |
| <b>With HRV</b>                             |                                           |                                           |                                             |                                             |                                             |
| Vaccination costs                           | 457,706,645<br>(13,486,355)               | 444,662,724<br>(13,102,015)               | 431,990,534<br>(12,728,628)                 | 419,679,482<br>(12,365,882)                 | 407,719,276<br>(12,013,474)                 |
| Outpatient visit costs                      | 40,384,255<br>(1,189,925)                 | 31,890,443<br>(939,654)                   | 27,316,019<br>(804,868)                     | 24,045,930<br>(708,515)                     | 21,519,565<br>(634,075)                     |
| Hospitalisation costs                       | 177,182,966<br>(5,220,707)                | 117,696,167<br>(3,467,925)                | 85,098,706<br>(2,507,439)                   | 61,541,865<br>(1,813,335)                   | 48,173,521<br>(1,419,436)                   |
| <b>Total costs</b>                          | <b>675,273,866</b><br><b>(19,896,986)</b> | <b>594,249,334</b><br><b>(17,509,593)</b> | <b>544,405,260</b><br><b>(16,040,935)</b>   | <b>505,267,278</b><br><b>(14,887,732)</b>   | <b>477,412,362</b><br><b>(14,066,985)</b>   |
| <b>Difference HRV versus no vaccination</b> |                                           |                                           |                                             |                                             |                                             |
| Vaccination costs                           | 457,706,645<br>(13,486,355)               | 444,662,724<br>(13,102,015)               | 431,990,534<br>(12,728,628)                 | 419,679,482<br>(12,365,882)                 | 407,719,276<br>(12,013,474)                 |
| Outpatient visit costs                      | -9,990,419<br>(-294,368)                  | -17,056,991<br>(-502,585)                 | -20,239,999<br>(-596,373)                   | -22,154,816<br>(-652,793)                   | -23,364,532<br>(-688,437)                   |
| Hospitalisation costs                       | -22,252,117<br>(-655,660)                 | -76,095,372<br>(-2,242,155)               | -103,184,139<br>(-3,040,327)                | -121,375,214<br>(-3,576,328)                | -129,530,708<br>(-3,816,630)                |
| <b>Total difference</b>                     | <b>425,464,109</b><br><b>(12,536,326)</b> | <b>351,510,361</b><br><b>(10,357,275)</b> | <b>308,566,397</b><br><b>(9,091,928)</b>    | <b>276,149,452</b><br><b>(8,136,761)</b>    | <b>254,824,035</b><br><b>(7,508,406)</b>    |
| <b>Cumulative difference</b>                | <b>425,464,109</b><br><b>(12,536,326)</b> | <b>776,974,470</b><br><b>(22,893,601)</b> | <b>1,085,540,867</b><br><b>(31,985,529)</b> | <b>1,361,690,319</b><br><b>(40,122,289)</b> | <b>1,616,514,354</b><br><b>(47,630,695)</b> |

HRV: human rotavirus vaccine; THB: Thai baht; USD: United States dollar

**TABLE S 4: DETAILED RESULTS OF THE BUDGET IMPACT**

**SCENARIO ANALYSIS**

| Costs; THB (USD)                            | Year                                      |                                           |                                           |                                             |                                             |
|---------------------------------------------|-------------------------------------------|-------------------------------------------|-------------------------------------------|---------------------------------------------|---------------------------------------------|
|                                             | 2019                                      | 2020                                      | 2021                                      | 2022                                        | 2023                                        |
| <b>No vaccination</b>                       |                                           |                                           |                                           |                                             |                                             |
| Vaccination costs                           | 0 (0)                                     | 0 (0)                                     | 0 (0)                                     | 0 (0)                                       | 0 (0)                                       |
| Outpatient visit costs                      | 50,374,674<br>(1,484,293)                 | 48,947,434<br>(1,442,239)                 | 47,556,018<br>(1,401,241)                 | 46,200,746<br>(1,361,308)                   | 44,884,097<br>(1,322,513)                   |
| Hospitalisation costs                       | 199,435,083<br>(5,876,367)                | 193,791,539<br>(5,710,080)                | 188,282,845<br>(5,547,766)                | 182,917,079<br>(5,389,663)                  | 177,704,230<br>(5,236,066)                  |
| <b>Total costs</b>                          | <b>249,809,757</b><br><b>(7,360,660)</b>  | <b>242,738,973</b><br><b>(7,152,319)</b>  | <b>235,838,863</b><br><b>(6,949,007)</b>  | <b>229,117,825</b><br><b>(6,750,971)</b>    | <b>222,588,327</b><br><b>(6,558,579)</b>    |
| <b>With HRV</b>                             |                                           |                                           |                                           |                                             |                                             |
| Vaccination costs                           | 274,623,987<br>(8,091,813)                | 303,140,639<br>(8,932,058)                | 334,618,429<br>(9,859,553)                | 369,364,838<br>(10,883,358)                 | 407,719,276<br>(12,013,474)                 |
| Outpatient visit costs                      | 44,380,423<br>(1,307,672)                 | 37,919,976<br>(1,117,314)                 | 33,182,018<br>(977,710)                   | 28,839,191<br>(849,749)                     | 24,615,081<br>(725,285)                     |
| Hospitalisation costs                       | 186,083,813<br>(5,482,971)                | 146,367,444<br>(4,312,726)                | 118,379,865<br>(3,488,070)                | 93,076,454<br>(2,742,503)                   | 71,565,955<br>(2,108,695)                   |
| <b>Total costs</b>                          | <b>505,088,223</b><br><b>(14,882,456)</b> | <b>487,428,060</b><br><b>(14,362,098)</b> | <b>486,180,312</b><br><b>(14,325,333)</b> | <b>491,280,483</b><br><b>(14,475,610)</b>   | <b>503,900,312</b><br><b>(14,847,454)</b>   |
| <b>Difference HRV versus no vaccination</b> |                                           |                                           |                                           |                                             |                                             |
| Vaccination costs                           | 274,623,987<br>(8,091,813)                | 303,140,639<br>(8,932,058)                | 334,618,429<br>(9,859,553)                | 369,364,838<br>(10,883,358)                 | 407,719,276<br>(12,013,474)                 |
| Outpatient visit costs                      | -5,994,251<br>(-176,621)                  | -11,027,458<br>(-324,925)                 | -14,374,000<br>(-423,531)                 | -17,361,555<br>(-511,559)                   | -20,269,017<br>(-597,228)                   |
| Hospitalisation costs                       | -13,351,270<br>(-393,396)                 | -47,424,095<br>(-1,397,354)               | -69,902,979<br>(-2,059,696)               | -89,840,625<br>(-2,647,160)                 | -106,138,275<br>(-3,127,371)                |
| <b>Total difference</b>                     | <b>255,278,465</b><br><b>(7,521,796)</b>  | <b>244,689,087</b><br><b>(7,209,779)</b>  | <b>250,341,450</b><br><b>(7,376,326)</b>  | <b>262,162,658</b><br><b>(7,724,639)</b>    | <b>281,311,984</b><br><b>(8,288,875)</b>    |
| <b>Cumulative difference</b>                | <b>255,278,465</b><br><b>(7,521,796)</b>  | <b>499,967,552</b><br><b>(14,731,575)</b> | <b>750,309,002</b><br><b>(22,107,901)</b> | <b>1,012,471,659</b><br><b>(29,832,540)</b> | <b>1,293,783,644</b><br><b>(38,121,415)</b> |

HRV: human rotavirus vaccine; THB: Thai baht; USD: United States dollar
